# Supplementary material
Source: publisher figshare collection journal article supplement (https://frontiersin.figshare.com/ndownloader/files/24088712)
Supplement: Supplementary file [file 24088712]

## Supplementary Material

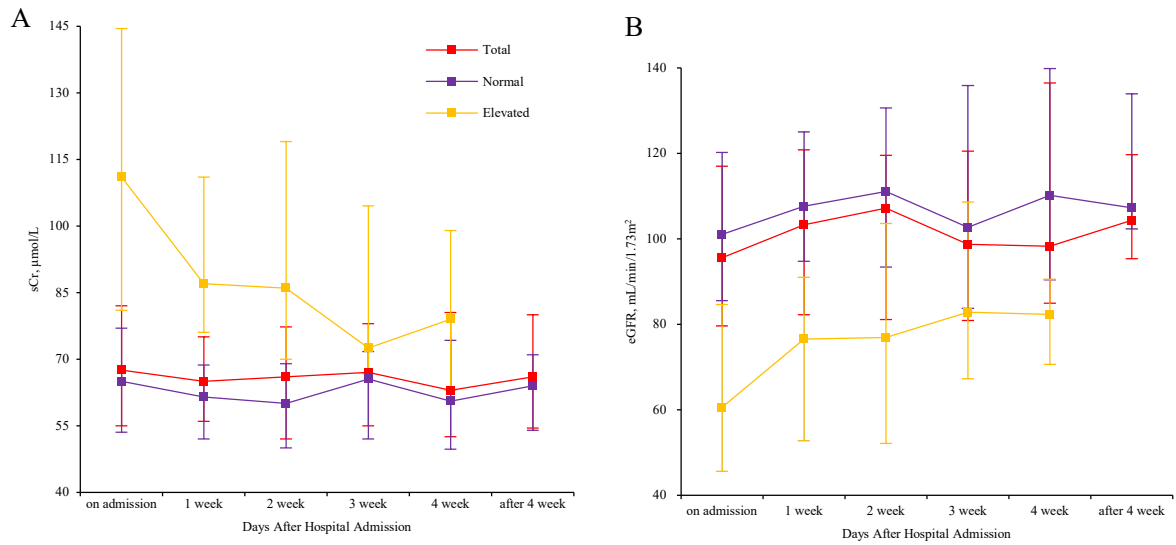

FIGURE S1 | Dynamic profile of kidney function. (A) Dynamic profile of sCr; (B) Dynamic profile of eGFR. sCr, serum creatinine; eGFR, estimated glomerular filtration rate. The data of sCr and eGFR after 4 week in sCr elevated group was missing.

TABLE S1 | Treatments and outcomes by the deadline.

|                                     | Total<br>n=116 | sCr normal<br>n=95   | sCr elevated<br>n=21  | p value |
|-------------------------------------|----------------|----------------------|-----------------------|---------|
| <b>Treatments</b>                   |                |                      |                       |         |
| Antibiotics                         | 97(83.6%)      | 80(84.2%)            | 17(81.0%)             | 0.969   |
| Antiviral treatment                 | 106(91.4%)     | 87(91.6%)            | 19(90.5%)             | -       |
| Antifungal treatment                | 10(8.6%)       | 5(5.3%)              | 5(23.8%)              | 0.021   |
| Corticosteroids                     | 63(54.3%)      | 47(49.5%)            | 16(76.2%)             | 0.026   |
| Intravenous immunoglobulin          | 21(18.1%)      | 17(17.9%)            | 4(19.0%)              | -       |
| Blood transfusion                   | 11(9.5%)       | 6(6.3%)              | 5(23.8%)              | 0.039   |
| Chinese traditional medicine        | 36(31.0%)      | 30(31.6%)            | 6(28.6%)              | 0.787   |
| Nasal cannula oxygen inhalation     | 55(47.4%)      | 46(48.4%)            | 9(42.9%)              | 0.644   |
| Non-invasive mechanical ventilation | 5(4.3%)        | 5(5.3%)              | 0(0.0%)               | 0.583   |
| Invasive mechanical ventilation     | 20(17.2%)      | 11(11.6%)            | 9(42.9%)              | 0.002   |
| Trachea intubation                  | 11(9.5%)       | 5(5.3%)              | 6(28.6%)              | 0.004   |
| Tracheostomy tube                   | 5(4.3%)        | 5(5.3%)              | 0(0.0%)               | 0.583   |
| ECMO                                | 4(3.4%)        | 1(1.1%)              | 3(14.3%)              | 0.019   |
| CRRT                                | 5(4.3%)        | 1(1.1%)              | 4(19.0%)              | 0.004   |
| Convalescent plasma                 | 3(2.6%)        | 3(3.2%)              | 0(0.0%)               | -       |
| Thoracic drainage                   | 2(1.7%)        | 1(1.1%)              | 1(4.8%)               | 0.331   |
| Bronchoalveolar lavage              | 2(1.7%)        | 1(1.1%)              | 1(4.8%)               | 0.331   |
| Hemoperfusion                       | 2(1.7%)        | 1(1.1%)              | 1(1.1%)               | 0.331   |
| <b>Outcomes*</b>                    |                |                      |                       |         |
| In the ICU                          | 19(16.4%)      | 12(12.6%)            | 7(33.3%)              | 0.046   |
| In general ward                     | 89(76.7%)      | 76(80.0%)            | 13(61.9%)             | 0.136   |
| Discharge                           | 8(6.9%)        | 7(7.4%)              | 1(4.8%)               | -       |
| Secondary infection                 | 34(29.3%)      | 21(22.1%)            | 13(61.9%)             | <0.0001 |
| Respiratory failure                 | 25(21.6%)      | 15(15.8%)            | 10(47.6%)             | 0.004   |
| ARDS                                | 31(26.7%)      | 21(22.1%)            | 10(47.6%)             | 0.017   |
| Heart failure                       | 6(5.2%)        | 1(1.1%)              | 5(23.8%)              | <0.0001 |
| Alimentary tract hemorrhage         | 3(2.6%)        | 0(0.0%)              | 3(14.3%)              | 0.005   |
| Liver damage                        | 4(3.4%)        | 3(3.2%)              | 1(4.8%)               | 0.555   |
| AKI                                 | 12(10.3%)      | 5(5.3%)              | 7(33.3%)              | 0.001   |
| Stage 1                             | 9(7.8%)        | 3(3.2%)              | 6(28.6%)              | 0.001   |
| Stage 2                             | 3(2.6%)        | 2(2.2%)              | 1(4.8%)               | 0.454   |
| Anemia                              | 7(6.0%)        | 3(3.2%)              | 4(19.0%)              | 0.024   |
| Inflammatory factor storm           | 3(2.6%)        | 1(1.1%)              | 2(9.5%)               | 0.084   |
| Shock                               | 2(1.7%)        | 2(2.1%)              | 0(0.0%)               | -       |
| Other                               | 8(6.9%)        | 5(5.3%) <sup>a</sup> | 3(14.3%) <sup>b</sup> | 0.317   |

\*The total observe period was 28.0 (13.5, 41.0) days. <sup>a</sup>Includes: Cardiac arrest & hypoxic, encephalopathy, gross hematuria, edema lower extremity, drug-induced leukopenia, drug-induced respiratory depression. <sup>b</sup>Includes: gout, delirium, drug-induced leukopenia. sCr, serum creatinine; ECMO, extracorporeal membrane oxygenation; CRRT, continuous renal replacement therapy; ICU, intensive care unit; ARDS, acute respiratory distress syndrome; AKI, acute kidney injury.

TABLE S2 | Review of the clinical management course of the 5 in-hospital AKI

| Patient ID | Sex    | Age, years | Date of onset | Symptom of onset                       | Diagnosis on admission | Comorbidity         | Treatments after admission                                                                             | New diagnosis in-hospital                                   | Time from onset to ICU admission, days | Time from onset to AKI, days | Management after AKI                     |
|------------|--------|------------|---------------|----------------------------------------|------------------------|---------------------|--------------------------------------------------------------------------------------------------------|-------------------------------------------------------------|----------------------------------------|------------------------------|------------------------------------------|
| 250****341 | female | 75         | 2020/2/6      | fever                                  | severe                 | HEN, DAM, CHD       | nasal cannula oxygen inhalation, antiviral, antibiotics                                                | hypokalemia, HF, anemia                                     | 30                                     | 32                           | dopamine to improve renal perfusion      |
| 250****870 | female | 73         | 2020/2/7      | fever, cough, sputum, fatigue, myalgia | critical               | DAM, hypothyroidism | antiviral, antibiotics, corticosteroids, BiPAP → trachea intubation(2/15)                              | ARF, second infection                                       | 37                                     | 14                           | exit the Remdisivir clinical trial       |
| 250****193 | male   | 66         | 2020/1/21     | fever                                  | critical               | HEN, hypothyroidism | BiPAP → trachea intubation<br>antiviral, antibiotics, corticosteroids                                  | gastrointestinal hemorrhage, RF, second infection           | 20                                     | 48                           | vasoactive agent (norepinephrine)        |
| 250****591 | male   | 56         | 2020/1/21     | fever(Tmax 37.8°C), cough, fatigue     | critical               | HEN                 | antiviral, antibiotics, corticosteroids<br>antimycotic, BiPAP→ trachea intubation (2/10 → ECMO (2/11 ) | ARDS, ARF, MDR, septic shock<br>gastrointestinal hemorrhage | 14                                     | 32                           | CRRT                                     |
| 250****542 | male   | 73         | 2020/1/31     | fever(Tmax 38.9°C), cough              | general                | HTN, DAM            | antiviral, antibiotics, corticosteroids; BiPAP                                                         | ARDS                                                        | 5 (2/15 out)                           | 10                           | trachea intubation, IVIG and antibiotics |

HEN, hypertension; DAM, diabetes mellitus; BiPAP, Bi-Level positive airway pressure; ECMO, extracorporeal membrane oxygenation; HF, heart failure; ARF, acute respiratory failure; ARDS, acute respiratory distress syndrome; MDR, multi-drug resistance; CRRT, continuous renal replacement therapy; IVIG, intravenous immunoglobulin; AKI, acute kidney injury; sCr, serum creatine.

TABLE S3| Laboratory findings of sCr and eGFR of the 5 in-hospital AKI.

| Patient ID | Days after admission         | 0    | 1  | 2   | 3    | 4   | 5   | 6    | 7   | 8   | 9   | 10 | 11  | 12  | 13  | 14   | 15  | 16   | 17  | 18  | 19   | 20    | 21 |
|------------|------------------------------|------|----|-----|------|-----|-----|------|-----|-----|-----|----|-----|-----|-----|------|-----|------|-----|-----|------|-------|----|
| 250****341 | sCr, µmol/L                  | 70   | -  |     | 61   | -   | -   | 61   |     | -   | -   | -  | -   | -   | -   | 69   | -   | 72   | -   | -   | 78   | 81    | -  |
|            | eGFR(CKD-EPI), mL/min/1.73m² | 73.3 | -  |     | 85.4 | -   | -   | 86.4 | -   | -   | -   | -  | -   | -   | -   | 74.5 | -   | 70.8 | -   | -   | 64.3 | 67.4  | -  |
| 250****870 | sCr, µmol/L                  | -    | -  | -   | 61   | -   | 58  | 68   | 66  | 70  | 119 | -  | -   | -   | 100 | 94   | -   | 69   | 57  | -   | -    | 56    | 49 |
|            | eGFR(CKD-EPI), mL/min/1.73m² | -    | -  | -   | 86   | -   | 88  | 77   | 80  | 74  | 39  | -  | -   | -   | 48  | 52   | -   | 75   | 88  | -   | -    | 89    | 93 |
| 250****193 | sCr, µmol/L                  | 80   | -  | -   | 57   | -   | 70  | -    | -   | -   | 83  | -  | 75  | -   | -   | -    | 80  | -    | -   | -   | 85   | -     | -  |
|            | eGFR(CKD-EPI), mL/min/1.73m² | 88   | -  | -   | 102  | -   | 93  | -    | -   | -   | 84  | -  | 91  | -   | -   | -    | 88  | -    | -   | -   | 82   | -     | -  |
| 250****591 | sCr, µmol/L                  | 65   | 74 | 56  | 36   | 43  | 43  | 69   | 52  | 97  | -   | 81 | 117 | 132 | 132 | 145  | -   | 170  | 180 | 100 | 96   | 145   | -  |
|            | eGFR(CKD-EPI), mL/min/1.73m² | 103  | 98 | 110 | 132  | 123 | 123 | 101  | 113 | 75  | -   | 93 | 60  | 52  | 52  | 46   | -   | 38   | 36  | 72  | 76   | 45    | -  |
| 250****542 | sCr, µmol/L                  | 89   | -  | -   | 93   | -   | 124 | 137  | -   | 117 | 78  | 84 | 79  | 86  | -   | -    | 82  | -    | -   | -   | -    | 80    | -  |
|            | eGFR(CKD-EPI), mL/min/1.73m² | 74   | -  | -   | 70   | -   | 49  | 44   | -   | 53  | 85  | 79 | 85  | 77  | -   | -    | 81  | -    | -   | -   | -    | 84    | -  |
| Continued  |                              |      |    |     |      |     |     |      |     |     |     |    |     |     |     |      |     |      |     |     |      |       |    |
| Patient ID | Days after admission         | 22   | 23 | 24  | 25   | 26  | 27  | 28   | 29  | 30  | 31  | 32 | 33  | 34  | 35  | 36   | 37  | 38   | 39  | 40  | 41   | ..... |    |
| 250****341 | sCr, µmol/L                  | -    | 80 | 110 | -    | -   | -   | -    | -   | -   | -   | -  | -   | -   | -   | -    | -   | -    | -   | -   | -    | -     | -  |
|            | eGFR(CKD-EPI), mL/min/1.73m² | -    | 62 | 42  | -    | -   | -   | -    | -   | -   | -   | -  | -   | -   | -   | -    | -   | -    | -   | -   | -    | -     | -  |
| 250****870 | sCr, µmol/L                  | -    | 42 | 47  | -    | -   | -   | -    | -   | -   | -   | -  | -   | -   | -   | -    | -   | -    | -   | -   | -    | -     | -  |
|            | eGFR(CKD-EPI), mL/min/1.73m² | -    | 98 | 94  | -    | -   | -   | -    | -   | -   | -   | -  | -   | -   | -   | -    | -   | -    | -   | -   | -    | -     | -  |
| 250****193 | sCr, µmol/L                  | -    | -  | 76  | -    | 90  | -   | 105  | -   | -   | 121 | 82 | 63  | 65  | -   | 104  | 131 | -    | 105 | -   | 98   | -     | -  |
|            | eGFR(CKD-EPI), mL/min/1.73m² | -    | -  | 90  | -    | 76  | -   | 63   | -   | -   | 53  | 86 | 98  | 96  | -   | 64   | 49  | -    | 63  | -   | 69   | -     | -  |
| 250****591 | sCr, µmol/L                  | -    | -  | -   | -    | -   | -   | -    | -   | -   | -   | -  | -   | -   | -   | -    | -   | -    | -   | -   | -    | -     | -  |
|            | eGFR(CKD-EPI), mL/min/1.73m² | -    | -  | -   | -    | -   | -   | -    | -   | -   | -   | -  | -   | -   | -   | -    | -   | -    | -   | -   | -    | -     | -  |
| 250****542 | sCr, µmol/L                  | -    | -  | 77  | -    | -   | -   | -    | -   | -   | -   | -  | -   | -   | -   | 92   | -   | -    | -   | -   | -    | -     | -  |
|            | eGFR(CKD-EPI), mL/min/1.73m² | -    | -  | 86  | -    | -   | -   | -    | -   | -   | -   | -  | -   | -   | -   | 71   | -   | -    | -   | -   | -    | -     | -  |

sCr, serum creatine; eGFR, estimated glomerular filtration rate; CKD-EPI, Chronic Kidney Disease Epidemiology Collaboration.
